# Supplementary material for: Mutation analysis of 24 known cancer genes in the NCI-60 cell line set
Source: Oxford University Press journal article supplement (doi:10.1158/1535-7163.mct-06-0433), 2006-11-01
Supplement: 15357163mct060433-sup-mct-06-0433--suppl_table_2.xls [file 15357163mct060433-sup-mct-06-0433--suppl_table_2.xls]

## Sheet: Sheet1
Supplementary table 2. Primer sequences for multiplex PCR
ARF (NP_478102)	Forward Primer	Reverse Primer	Control primers	comment
ARF-exon1	CCTCGTGCTGATGCTACTGA	CCGCCTCCAGAAAACTTAGA	actin_3
CDKN2A	Forward Primer	Reverse Primer	Control primers	comment
CDKN2A-exon 1	CCAGGAGGAGGTCTGTGATT	ACCGGAGGAAGAAAGAGGAG	actin_3
CDKN2A-exon2	CTTCCTGGACACGCTGGT	AGTCTTCATTGCTCCGCAGT	actin_3
CDKN2A-exon3	CAACAGTGTCAGAAACGATGC	AACGCCTGTTTTCTTTCTGC	actin_3
RB1	Forward Primer	Reverse Primer	Control primers	comment
RB1-exon 1	GGTTTTTCTCAGGGGACGTT	GTCAAGTTGAAGCCGAGACC	comp_1	Failed
RB1-exon 2	CCATGCAAGCAAATATTTTTCA	CCAATACTCCATCCACAGATGA	actin_8
RB1-exon 3	AAGGAACTGTGGGGAATCTG	CAAATCCTTGCTTTTCTGTTCA	actin_8
RB1-exon 4	GGAATTGGATGAATGGATGTG	TTCTTCAACAGTCTTGACATAGCA	actin_8
RB1-exon 5	TTTTTCTTTTCAGGACATGTGAA	TGCCTGTAACAGACCCTCAA	actin_8
RB1-exon 6	CATTGGTGCTAAAAGTTTCTTGG	CGATTATCCCTGGGTGGATT	actin_8
RB1-exon 7	ACCATGCTGATAGTGATTGTTG	CAGCCTTAGAACCATGTTTGG	actin_8
RB1-exon 8	TGCACGGATAGCAAAACAAC	CAGCCTTGGCAGGGTATTT	actin_8
RB1-exon 9	TGCACCTGTGAATAGCCACT	CCTCCCTCCACAGTCTCAAA	actin_8
RB1-exon 10	TTGAAAATCTTTCTAAACGATACGA	GCCATTATCTTTTGGTGCACAT	actin_8
RB1-exon 11	CATAATGGAAAGAGACCCACAA	TCTGAAACACTATAAAGCCATGAA	actin_8
RB1-exon 12	TCAGCAAGTGATCAACCTTCA	CCTCAAAAAGTTCATCCCAAA	actin_8
RB1-exon 13	GGACAGGGTTGTGTCGAAAT	GGCATGTATAGTCCCATTCACA	actin_8
RB1-exon 14	TGGAGTTCGCTTGTATTACCG	GGGTGAAATGGCACAATCTT	actin_8
RB1-exon 15	GGCAGATCAGGAGGTCAAGG	AAATTTACCTAAAATTTTGAATGGA	comp_10
RB1-exon 16	GCAAACTTCTGAATGACAACATTT	TCTTGAATACTCCTTTGGCACTC	actin_8
RB1-exon 17	TCAAAATTGGAAGGCTATTTCC	GGGATTCCATGATTCGATGT	actin_8
RB1-exon 18	TCACCTTGAATCTGCTTGTCC	TGCCATTCTGACTCTTGGAA	actin_8
RB1-exon 19	CCCAGAAGCCATTGAAATCT	CCCTCTCCGTTCCATGTCT	actin_8
RB1-exon 20	ATCATCTGGACCCTTTTCCA	ACAAGGTGTGGTGGTACACG	comp_1
RB1-exon 21	TGGCATATGCAAAGTGAAGAA	CAAATACCTGCTTATTACAGGGATAAA	actin_8
RB1-exon 22	GGTCTTCATGCAGAGACTGAAA	GGATCAAAATAATCCCCCTCTC	actin_8	exon 22 & 23 share reverse primer
RB1-exon 23	CTTCCACCAGGGTAGGTCAA	GGATCAAAATAATCCCCCTCTC	actin_8	exon 22 & 23 share reverse primer
RB1-exon 24	TGCTCATCTCTGCAAAATTGTAT	GTGAGCAAAAACAGCTCACG	actin_8
RB1-exon 25	TGGGTGTTTAATTGGGGATG	ATGACCATCTCGGCTACTGG	actin_8
RB1-exon 26	CAAATTGCATACCAACATTCAG	GCTGAAATTTGGACTCTCCTG	actin_8
RB1-exon 27	GTGCAGATGCAATTGTTTGG	TGAATGGGCAGTCAATCAAA	actin_8
PTEN	Forward Primer	Reverse Primer	Control primers	comment
PTEN-exon 1	CTCTGGCTGCTGAGGAGAAG	CCGCAGAAATGGATACAGGT	comp_6
PTEN-exon 2	CTCCAGCTATAGTGGGGAAAA	CCATTAGGTACGGTAAGCCAAA	actin_10
PTEN-exon 3	TGGATTCAAAGCATAAAAACCAT	ACCTCCATGGAAGATGCTATTA	actin_10
PTEN-exon 4	TGCTGAAAGACATTATGACACC	TCTGCTTTCTCCCTGTGATTG	actin_10
PTEN-exon 5	CCTGAATAAAATGGGGGAAAA	TTCGTCCCTTTCCAGCTTTA	actin_10
PTEN-exon 6	ATGTTCAGTGGCGGAACTTG	GCTGAACTCCTCTGGTGGAC	actin_10
PTEN-exon 7	CTCCAATTCAGGACCCACAC	TGGTCCCATGCTAATTTCTTC	actin_10
PTEN-exon 8	TTTGAGTGAAGAAAAATCATGTGAA	CTTGTCATTATCTGCACGCTCT	actin_10
PTEN-exon 9	CTGACACCACTGACTCTGATCC	TAAAACGGGAAAGTGCCATC	actin_10
MADH4	Forward Primer	Reverse Primer	Control primers	comment
MADH4-exon1	TCTTCCCGAAGTGAACTCCT	GACCAGGGCCGTGTTGTT	comp_6
MADH4-exon2				Failed design
MADH4-exon3	GCAATTTCATCTTTTCCCAAG	TGCCACCATAGAGGGTATAGAAA	actin_3
MADH4-exon4	CTGAGCACAGGCCTTGAAAT	TAAAGTCGCGGGCTATCTTC	actin_3
MADH4-exon5	AACATAAAGGGAAAAGGATCTCAA	CTGCCGCTCACACAAACTAA	actin_3
MADH4-exon6	TTTTCTGGGAATAGAAGCTTATAAAAA	CCAAGTGATTGTGCATACCTGT	actin_3
MADH4-exon7	CCAGAGAGAGAGGTGGATGG	GCTGGCTGACCAGTAAATCC	actin_3
MADH4-exon8	AGCACTACCACCTGGACTGG	GCAAACAAACAAATGAATGGAA	actin_8
MADH4-exon9	TCTTAGACATTGCATAAGCTTGTTTT	TTCTTTTCTTTTGGGGACAGTT	actin_8
MADH4-exon10	TTGGGTGCATTACATTTCCA	CATGGGAAAACATAACCTTGAA	actin_8
MADH4-exon11	TGAAGGTGATGTTTGGGTCA	AAATGTAACAAATTGGCAACGA	actin_8
MADH4-exon12	AAATAAGTCAGGCATTGGTTTTT	AAAAGAATGCAAACAGGGTCA	actin_8
MADH4-exon13	CTAGGCACAAGGTTGGTTGC	TTGATGGCAAAGGGCTTAGA	actin_8
CONTROL PRIMERS	Sense	Antisense		comment	Chr	Start	Finish	Size	Gene
comp_1	CATGCAAATTGTGGTTCCTG	GGGCCAAACATGAGTGACTT			7	20033011	20033691	680bp	None
comp_6	GGGATTTCTCCCTGAAAAGC	TGGGGATTCAGATTCTTTGC			1	179499897	179500592	696bp	NPL
comp_10	CCTGGCCAGAACTTCCAATA	TTGCCGGGATCTGTTATTTC			6	75069806	75070425	620bp	None
actin_3	CCTGCAGAGTTCCAAAGGAG	GGCATCCTCACCCTGAAGTA			7	5341890	5342209	320bp	Actin
actin_8	GTCAGGCAGCTCGTAGCTCT	AACACTGGCTCGTGTGACAA			7	5341223	5341801	579bp	Actin
actin_10	AAAGCCATGCCAATCTCATC	GAAGCTAAGTCCTGCCCTCA			7	5340537	5341089	553bp	Actin
