# Supplementary material for: Mutation analysis of 24 known cancer genes in the NCI-60 cell line set
Source: Oxford University Press journal article supplement (doi:10.1158/1535-7163.mct-06-0433), 2006-11-01
Supplement: 15357163mct060433-sup-mct-06-0433--suppl_table_3.xls [file 15357163mct060433-sup-mct-06-0433--suppl_table_3.xls]

## Sheet: Variants of unknown signif.
Supplemental Table 3a - Variants of unknown significance in 24 cancer genes detected in the NCI-60
STS	Tumour	Gene	Zygosity	cDNA	AA	Type
stCE05-4611	SK-MEL-5	APC	Het	c.1219C>T	p.L407F	non-synonymous
stCE05-4613	KM12	APC	Het	c.1412G>A	p.G471E	non-synonymous
stCE05-4615	HCT-15	APC	Het	c.2180G>T	p.R727M	non-synonymous
stCE05-4617	HCT-15	APC	Het	c.2979G>T	p.K993N	non-synonymous
stCE05-4619	NCI-H226	APC	Het	c.3531T>G	p.I1177M	non-synonymous
stCE05-4605	SF539	APC	Het	c.388A>G	p.S130G	non-synonymous
stCE05-4605	SK-MEL-28	APC	Hom	c.388A>G	p.S130G	non-synonymous
stCE05-4623	HCT-15	APC	Het	c.4683G>T	p.K1561N	non-synonymous
stCE05-4606	HCC2998	APC	Het	c.503G>T	p.R168I	non-synonymous
stCE05-4624	HCT-15	APC	Het	c.5337A>G	p.I1779M	non-synonymous
stCE05-4625	HCC2998	APC	Het	c.5591C>A	p.S1864Y	non-synonymous
stCE05-4628	HCC2998	APC	Het	c.6500T>G	p.I2167S	non-synonymous
stCE05-4631	HCT-15	APC	Het	c.7648G>C	p.E2550Q	non-synonymous
stCE05-4632	RXF393	APC	Het	c.7862C>G	p.S2621C	non-synonymous
stCE05-4633	U031	APC	Het	c.7979G>A	p.R2660K	non-synonymous
stCE05-4633	HCC2998	APC	Het	c.8160T>G	p.N2720K	non-synonymous
stCE07-4025	KM12	BRAF	Het	c.1209_1210insC	p.A404fs*9	non-synonymous
stCE07-4027	HT-29	BRAF	Het	c.356C>G	p.T119S	non-synonymous
stCE07-4031	LOXIMVI	BRAF	Het	c.622A>G	p.I208V	non-synonymous
stCE17-1641	NCI-H23	BRCA1	Het	c.1487G>A	p.R496H	non-synonymous
stCE17-1640	HCT-15	BRCA1	Het	c.1988G>A	p.S663N	non-synonymous
stCE17-1638	UACC-62	BRCA1	Het	c.2494C>T	p.P832S	non-synonymous
stCE17-1637	DU-145	BRCA1	Het	c.2884G>A	p.E962K	non-synonymous
stCE17-1637	NCI-H322M	BRCA1	Het	c.3042G>A	p.M1014I	non-synonymous
stCE17-1654	KM12	BRCA1	Het	c.4735C>T	p.P1579S	non-synonymous
stCE17-1654	MOLT-4	BRCA1	Het	c.4868C>T	p.A1623V	non-synonymous
stCE13-422	HCT-15	BRCA2	Het	c.1460C>T	p.A487V	non-synonymous
stCE13-442	HCC2998	BRCA2	Het	c.2451G>T	p.K817N	non-synonymous
stCE13-444	HCC2998	BRCA2	Het	c.2943A>C	p.K981N	non-synonymous
stCE13-446	HCC2998	BRCA2	Hom	c.3529G>A	p.D1177N	non-synonymous
stCE13-449	NCI-H460	BRCA2	Het	c.4584C>G	p.S1528R	non-synonymous
stCE13-449	KM12	BRCA2	Het	c.4695G>T	p.K1565N	non-synonymous
stCE13-456	HCC2998	BRCA2	Het	c.6406T>G	p.L2136V	non-synonymous
stCE13-458	DU-145	BRCA2	Hom	c.6851C>T	p.S2284L	non-synonymous
stCE13-425	SK-OV-3	BRCA2	Het	c.7364A>G	p.H2455R	non-synonymous
stCE13-460	HCT-15	BRCA2	Het	c.8351G>A	p.R2784Q	non-synonymous
stCE13-460	SK-MEL-28	BRCA2	Het	c.8473G>A	p.A2825T	non-synonymous
stCE13-420	HCC2998	BRCA2	Het	c.862C>T	p.P288S	non-synonymous
stCE13-431	HCC2998	BRCA2	Het	c.8686C>T	p.R2896C	non-synonymous
stCE13-435	IGROV-1	BRCA2	Het	c.9448C>A	p.P3150T	non-synonymous
stCE09-46829	UACC-257	CDKN2A	Hom	c.242C>T	p.P81L	non-synonymous
stCE09-46829	SN12C	CDKN2A	Hom	c.322G>T	p.D108Y	non-synonymous
stCE09-2484	OVCAR-4	CDKN2A	Hom	c.61T>A	p.S21T	non-synonymous
stCE03-5351	RXF393	CTNNB1	Het	c.1138A>T	p.N380Y	non-synonymous
stCE03-5347	OVCAR-8	CTNNB1	Het	c.77A>G	p.Q26R	non-synonymous
stCE03-5360	COLO-205	CTNNB1	Hom	c.860A>G	p.N287S	non-synonymous
stCE03-5360	DU-145	CTNNB1	Hom	c.914C>G	p.A305G	non-synonymous
stCE07-2661	CCRF-CEM	EGFR	Het	c.3352G>A	p.A1118T	non-synonymous
stCE07-2646	SF268	EGFR	Het	c.866C>T	p.A289V	non-synonymous
stCE07-2660	SN12C	EGFR	Hom	Exon 26 +3 A>T p.? (SPLICE donor)		splice
stCE17-1173	HCC2998	ERBB2	Het	c.2447G>A	p.R816H	non-synonymous
stCE17-1378	SF268	ERBB2	Hom	c.3647C>A	p.A1216D	non-synonymous
stCE17-1379	OVCAR-5	ERBB2	Het	c.3647C>A	p.A1216D	non-synonymous
stCE17-1367	KM12	ERBB2	Het	c.689C>T	p.P230L	non-synonymous
stCE13-358	HCT-116	FLT3	Het	>c.2955_2956delTC	p.P986fs*8	non-synonymous
stCE13-305	MCF7	FLT3	Het	c.1102T>A	p.C368S	non-synonymous
stCE13-306	M14	FLT3	Het	c.1211C>T	p.S404F	non-synonymous
stCE13-306	MDA-MB-435	FLT3	Het	c.1211C>T	p.S404F	non-synonymous
stCE13-306	HCC2998	FLT3	Het	c.1217T>G	p.F406C	non-synonymous
stCE13-306	NCI-H23	FLT3	Het	c.1249A>C	p.I417L	non-synonymous
stCE13-307	SK-OV-3	FLT3	Het	c.1349C>T	p.A450V	non-synonymous
stCE13-359	SK-OV-3	FLT3	Het	c.175T>G	p.S59A	non-synonymous
stCE13-200	NCI-H23	FLT3	Het	c.2213C>A	p.P738H	non-synonymous
stCE13-301	IGROV-1	FLT3	Het	c.580G>A	p.V194M	non-synonymous
stCE13-301	NCI-H460	FLT3	Het	c.580G>A	p.V194M	non-synonymous
stCE13-301	HCT-116	FLT3	Het	c.590T>C	p.V197A	non-synonymous
stCE13-302	HCC2998	FLT3	Het	c.659T>G	p.V220G	non-synonymous
stCE13-304	A549	FLT3	Het	c.969C>A	p.N323K	non-synonymous
stCE13-304	NCI-H226	FLT3	Hom	c.970G>A	p.D324N	non-synonymous
stCE13-305	NCI-H322M	FLT3	Hom	Exon 9 +1 G>T p.? (SPLICE donor)		splice
stCE11-2307	MOLT-4	HRAS	Het	c.368G>A	p.R123H	non-synonymous
stCE04-3755	HCT-15	KIT	Het	c.404G>A	p.R135H	non-synonymous
stCE04-3765	NCI-H522	KIT	Het	c.821C>A	p.T274K	non-synonymous
stCE12-17	HCC2998	KRAS	Het	c.436G>A	p.A146T	non-synonymous
stCE12-17	NCI-ADR-RES	KRAS	Het	c.362C>A	p.P121H	non-synonymous
stCE12-2227	RXF393	KRAS	Het	c.458A>T	p.D153V	non-synonymous
stCE18-203	IGROV-1	MADH4	Het	c.1484T>C	p.L495P	non-synonymous
stCE17-1113	HCT-15	MAP2K4	Het	c.1153C>A	p.L385M	non-synonymous
stCE17-1106	HCC2998	MAP2K4	Hom	c.400C>T	p.R134W	non-synonymous
stCE07-4593	CAKI-1	MET	Het	c.3658G>A	p.V1220I	non-synonymous
stCE07-2546	CAKI-1	MET	Hom	c.3712G>A	p.V1238I	non-synonymous
stCE07-2533	HCT-116	MET	Het	c.713delT	p.L238fs*25	non-synonymous
stCE07-2533	COLO-205	MET	Het	c.997A>T	p.I333L	non-synonymous
stCE04-3793	NCI-H322M	PDGFRA	Hom	c.1205T>C	p.V402A	non-synonymous
stCE04-3237	IGROV-1	PDGFRA	Het	c.1285G>A	p.G429R	non-synonymous
stCE04-3238	EKVX	PDGFRA	Het	c.1385G>A	p.W462*	non-synonymous
stCE04-3823	MDA-MB-231	PDGFRA	Het	c.515A>T	p.Y172F	non-synonymous
stCE04-3817	OVCAR-8	PDGFRA	Het	c.661C>T	p.L221F	non-synonymous
stCE04-3817	DU-145	PDGFRA	Het	c.723G>T	p.E241D	non-synonymous
stCE04-3235	HOP-62	PDGFRA	Het	c.998A>G	p.K333R	non-synonymous
stCE04-3235	MDA-MB-231	PDGFRA	Het	c.998A>G	p.K333R	non-synonymous
stCE04-3239	HCC2998	PDGFRA	Het	Exon 10 +4 G>A p.? (SPLICE donor)		splice
stCE04-3238	786-0	PDGFRA	Het	Exon 9 -3 T>C p.? (SPLICE acceptor)		splice
stCE03-5420	IGROV-1	PIK3CA	Het	c.3207A>G	p.*1069W	non-synonymous
stCE10-2053	HCC2998	PTEN	Het	c.137A>G	p.Y46C	non-synonymous
stCE10-2054	HCC2998	PTEN	Het	c.389G>A	p.R130Q	non-synonymous
stCE10-2054	IGROV-1	PTEN	Het	c.464A>G	p.Y155C	non-synonymous
stCE10-2049	SK-MEL-28	PTEN	Hom	c.499A>G	p.T167A	non-synonymous
stCE13-389	CAKI-1	RB1	Het	c.293T>C	p.L98P	non-synonymous
stCE10-1972	DU-145	RET	Het	c.2410G>A	p.V804M	non-synonymous
stCE10-2030	RXF393	RET	Hom	c.2832C>G	p.I944M	non-synonymous
stCE10-1923	NCI-H522	RET	Het	c.842C>T	p.A281V	non-synonymous
stCE10-2033	MOLT-4	RET	Het	c.889C>T	p.R297C	non-synonymous
stCE03-5596	EKVX	VHL	Het	c.332/333GC>TT	p.S111I	non-synonymous
stCE05-4631	HOP-62	APC	Het	c.7632A>T	p.S2544S	synonymous
stCE05-4619	K-562	APC	Het	c.3471G>A	p.E1157E	synonymous
stCE07-4026	DU-145	BRAF	Het	c.2124C>T	p.P708P	synonymous
stCE07-4026	HCT-116	BRAF	Het	c.1998T>C	p.I666I	synonymous
stCE17-1641	KM12	BRCA1	Het	c.1485G>A	p.E495E	synonymous
stCE17-1640	RPMI-8226	BRCA1	Het	c.1971A>G	p.Q657Q	synonymous
stCE13-448	IGROV-1	BRCA2	Het	c.4314C>T	p.V1438V	synonymous
stCE13-450	MOLT-4	BRCA2	Het	c.4977C>T	p.S1659S	synonymous
stCE09-2487	HCT-15	CDKN2A	Het	c.231T>C	p.G77G	synonymous
stCE07-2655	DU-145	EGFR	Het	c.2400C>T	p.D800D	synonymous
stCE17-1175	KM12	ERBB2	Het	c.2691G>A	p.R897R	synonymous
stCE13-311	KM12	FLT3	Het	c.1936C>T	p.L646L	synonymous
stCE13-306	UACC-257	FLT3	Het	c.1278A>G	p.Q426Q	synonymous
stCE11-27	CCRF-CEM	HRAS	Het	c.177C>T	p.A59A	synonymous
stCE04-3767	EKVX	KIT	Het	c.1674G>A	p.K558K	synonymous
stCE18-200	HCC2998	MADH4	Het	c.1134A>G	p.R378R	synonymous
stCE07-4575	RPMI-8226	MET	Het	c.654G>A	p.R218R	synonymous
stCE07-4577	RPMI-8226	MET	Het	c.1131C>T	p.I377I	synonymous
stCE04-3808	COLO-205	PDGFRA	Het	c.801A>G	p.P267P	synonymous
stCE04-3231	EKVX	PDGFRA	Het	c.153G>A	p.G51G	synonymous
stCE04-3242	HCC2998	PDGFRA	Het	c.1989C>T	p.A663A	synonymous
stCE04-3231	HCT-116	PDGFRA	Het	c.201C>T	p.S67S	synonymous
stCE13-407	SK-MEL-28	RB1	Het	c.2682G>A	p.E894E	synonymous
stCE13-393	SNB75	RB1	Hom	c.861G>A	p.E287E	synonymous
stCE10-1941	IGROV-1	RET	Het	c.1197G>A	p.P399P	synonymous
stCE19-1391	MOLT-4	STK11	Het	c.630C>T	p.C210C	synonymous

## Sheet: SNP
Suppmental Table 3b - SNPs in the 24 cancer genes detected in the NCI-60 cell lines
STS_NAME	GENE_NAME	cDNA	AA	Db/ref	TYPE
stCE05-4613	APC	c.1458T>C	p.Y486Y	dbSNP	synonymous
stCE05-4617	APC	c.2805C>T	p.Y935Y	CGP/multi	synonymous
stCE05-4618	APC	c.3165A>T	p.I1055I	CGP/multi	synonymous
stCE05-4622	APC	c.4326T>A	p.P1442P	CGP/multi	synonymous
stCE05-4624	APC	c.5265G>A	p.A1755A	CGP/multi	synonymous
stCE05-4624	APC	c.5034G>A	p.G1678G	dbSNP	synonymous
stCE05-4624	APC	c.5268T>G	p.S1756S	dbSNP	synonymous
stCE05-4625	APC	c.5465T>A	p.V1822D	dbSNP	synonymous
stCE05-4630	APC	c.7201C>T	p.L2401L	dbSNP	synonymous
stCE05-4631	APC	c.7504G>A	p.G2502S	dbSNP	non-synonymous
stCE07-4029	BRAF	c.1383A>G	p.Q461Q	CGP/multi	synonymous
stCE07-4033	BRAF	c.1929A>G	p.G643G	dbSNP	synonymous
stCE17-1632	BRCA1	c.4308T>C	p.S1436S	CGP/multi	synonymous
stCE17-1635	BRCA1	c.3548A>G	p.K1183R	dbSNP	synonymous
stCE17-1636	BRCA1	c.3113A>G	p.E1038G	dbSNP	non-synonymous
stCE17-1638	BRCA1	c.2612C>T	p.P871L	dbSNP	non-synonymous
stCE17-1639	BRCA1	c.2311T>C	p.L771L	dbSNP	synonymous
stCE17-1640	BRCA1	c.2077G>A	p.D693N	dbSNP	non-synonymous
stCE17-1640	BRCA1	c.2082C>T	p.S694S	dbSNP	synonymous
stCE17-1654	BRCA1	c.4837A>G	p.S1613G	dbSNP	non-synonymous
stCE17-1654	BRCA1	c.4883T>C	p.M1628T	dbSNP	non-synonymous
stCE17-1642	BRCA1	c.1067A>G	p.Q356R	dbSNP	non-synonymous
stCE17-1630	BRCA1	c.4535G>T	p.S1512I	dbSNP	non-synonymous
stCE13-421	BRCA2	c.1114A>C	p.N372H	dbSNP	non-synonymous
stCE13-421	BRCA2	c.1365A>G	p.S455S	dbSNP	synonymous
stCE13-425	BRCA2	c.7242A>G	p.S2414S	dbSNP	synonymous
stCE13-441	BRCA2	c.2229T>C	p.H743H	dbSNP	synonymous
stCE13-445	BRCA2	c.3396A>G	p.K1132K	dbSNP	synonymous
stCE13-447	BRCA2	c.4068G>A	p.L1356L	dbSNP	synonymous
stCE13-447	BRCA2	c.3807T>C	p.V1269V	dbSNP	synonymous
stCE13-451	BRCA2	c.5199C>T	p.S1733S	dbSNP	synonymous
stCE13-453	BRCA2	c.5744C>T	p.T1915M	dbSNP	non-synonymous
stCE13-438	BRCA2	c.10024G>A	p.E3342K	dbSNP	non-synonymous
stCE13-420	BRCA2	c.865A>C	p.N289H	dbSNP	non-synonymous
stCE13-444	BRCA2	c.2971A>G	p.N991D	dbSNP	non-synonymous
stCE09-2486	CDKN2A	c.444G>A	p.A148T	dbSNP	non-synonymous
stCE03-5349	CTNNB1	c.642C>T	p.T214T	dbSNP	synonymous
stCE03-5359	CTNNB1	c.2340C>T	p.D780D	dbSNP	synonymous
stCE07-2312	EGFR	c.474C>T	p.N158N	dbSNP	synonymous
stCE07-2315	EGFR	c.1839C>T	p.A613A	dbSNP	synonymous
stCE07-2651	EGFR	c.1887T>A	p.T629T	dbSNP	synonymous
stCE07-2655	EGFR	c.2361G>A	p.Q787Q	dbSNP	synonymous
stCE07-2656	EGFR	c.2508C>T	p.R836R	dbSNP	synonymous
stCE07-2657	EGFR	c.2709T>C	p.T903T	dbSNP	synonymous
stCE07-2659	EGFR	c.2982C>T	p.D994D	dbSNP	synonymous
stCE07-3440	EGFR	c.1562G>A	p.R521K	dbSNP	non-synonymous
stCE17-1157	ERBB2	c.528C>T	p.N176N	CGP/multi	synonymous
stCE17-1369	ERBB2	c.1963A>G	p.I655V	dbSNP	non-synonymous
stCE17-1378	ERBB2	c.3508C>G	p.P1170A	CGP/multi	non-synonymous
stCE17-1241	ERBB2	c.381C>G	p.T127T	dbSNP	synonymous
stCE13-302	FLT3	c.680C>T	p.T227M	dbSNP	non-synonymous
stCE13-307	FLT3	Exon 11 -3 T>C	p. ?	CGP/multi	splice
stCE13-309	FLT3	c.1683A>G	p.L561L	CGP/multi	synonymous
stCE11-26	HRAS	c.81T>C	p.H27H	dbSNP	synonymous
stCE04-3757	KIT	c.2394C>T	p.I798I	CGP/multi	synonymous
stCE04-3762	KIT	c.2586G>C	p.L862L	dbSNP	synonymous
stCE04-3763	KIT	c.1638A>G	p.K546K	CGP/multi	synonymous
stCE04-3763	KIT	c.1621A>C	p.M541L	dbSNP	non-synonymous
stCE04-3763	KIT	c.1594G>A	p.V532I	CGP/multi	non-synonymous
stCE12-2227	KRAS	c.519T>C	p.D173D	dbSNP	synonymous
stCE07-2407	MET	c.1983T>A	p.S661R	CGP/multi	non-synonymous
stCE07-2531	MET	c.144G>A	p.A48A	dbSNP	synonymous
stCE07-2532	MET	c.504G>T	p.E168D	CGP/multi	non-synonymous
stCE07-2532	MET	c.534C>T	p.S178S	CGP/multi	synonymous
stCE07-2534	MET	c.1124A>G	p.N375S	CGP/multi	non-synonymous
stCE07-2537	MET	c.1944A>G	p.Q648Q	dbSNP	synonymous
stCE07-2542	MET	c.3029C>T	p.T1010I	CGP/multi	non-synonymous
stCE07-2547	MET	c.3912C>T	p.D1304D	CGP/multi	synonymous
stCE07-2548	MET	c.4071G>A	p.A1357A	CGP/multi	synonymous
stCE07-2548	MET	c.4146G>A	p.P1382P	CGP/multi	synonymous
stCE07-4589	MET	c.2975C>T	p.T992I	CGP/multi	non-synonymous
stCE07-4594	MET	c.3858C>T	p.D1286D	dbSNP	synonymous
stCE07-4595	MET	c.4017G>A	p.A1339A	dbSNP	synonymous
stCE07-4595	MET	c.4092G>A	p.P1364P	dbSNP	synonymous
stCE17-1389	p53	c.108G>A	p.P36P	dbSNP	synonymous
stCE17-1389	p53	c.215C>G	p.P72R	dbSNP	non-synonymous
stCE04-3235	PDGFRA	c.939T>G	p.G313G	dbSNP	synonymous
stCE04-3238	PDGFRA	c.1432T>C	p.S478P	CGP/multi	non-synonymous
stCE04-3240	PDGFRA	c.1731G>A	p.P577P	CGP/multi	synonymous
stCE04-3241	PDGFRA	c.1809G>A	p.A603A	dbSNP	synonymous
stCE04-3246	PDGFRA	c.2472C>T	p.V824V	dbSNP	synonymous
stCE04-3823	PDGFRA	Exon 3 -3 C>T	p. ?	CGP/multi	splice
stCE04-3823	PDGFRA	c.612T>C	p.N204N	dbSNP	synonymous
stCE03-5407	PIK3CA	c.1911G>A	p.Q637Q	dbSNP	synonymous
stCE03-5408	PIK3CA	c.1930T>C	p.Y644H	dbSNP	non-synonymous
stCE03-5417	PIK3CA	c.1173A>G	p.I391M	dbSNP	non-synonymous
stCE03-5418	PIK3CA	c.2119G>A	p.E707K	dbSNP	non-synonymous
stCE03-5420	PIK3CA	c.3075C>T	p.T1025T	dbSNP	synonymous
stCE10-1877	RET	c.2712C>G	p.S904S	dbSNP	synonymous
stCE10-1880	RET	c.2944C>T	p.R982C	dbSNP	non-synonymous
stCE10-1971	RET	c.2071G>A	p.G691S	dbSNP	non-synonymous
stCE10-1972	RET	c.2508C>T	p.S836S	dbSNP	synonymous
stCE10-2029	RET	c.2307G>T	p.L769L	dbSNP	synonymous
stCE10-1963	RET	c.375C>A	p.V125V	dbSNP	synonymous
